# Supplementary material for: A metabolomic and systems biology perspective on the brain of the Fragile X syndrome mouse model
Source: HighWire-hosted journal article supplement (doi:10.1101/gr.116764.110), 2011-09-07
Supplement: SIdataset.xlsx [file SIdataset.xlsx]

## Sheet: SIdataset.txt
CTX KO	CRB KO	STR KO	HIP KO	9.9995	9.9985	9.9975	9.9965	9.9955	9.9945	9.9935	9.9925	9.9915	9.9905	9.9895	9.9885	9.9875	9.9865	9.9855	9.9845	9.9835	9.9825	9.9815	9.9805	9.9795	9.9785	9.9775	9.9765	9.9755	9.9745	9.9735	9.9725	9.9715	9.9705	9.9695	9.9685	9.9675	9.9665	9.9655	9.9645	9.9635	9.9625	9.9615	9.9605	9.9595	9.9585	9.9575	9.9565	9.9555	9.9545
1	0	0	0	-2.149e-05	-1.173e-05	-1.55e-05	-1.883e-05	-1.932e-05	-2.274e-05	-1.923e-05	-2.212e-05	-2.377e-05	-1.833e-05	-1.908e-05	-1.508e-05	-2.039e-05	-1.545e-05	-1.78e-05	-2.011e-05	-2.624e-05	-1.713e-05	-1.872e-05	-2.81e-05	-2.376e-05	-2.696e-05	-2.399e-05	-2.156e-05	-2.265e-05	-2.279e-05	-2.508e-05	-2.132e-05	-2.014e-05	-1.964e-05	-1.915e-05	-2.284e-05	-1.979e-05	-2.111e-05	-2.41e-05	-2.18e-05	-2.077e-05	-2.032e-05	-2.376e-05	-1.835e-05	-1.976e-05	-2.721e-05	-2.524e-05	-2.183e-05	-2.078e-05	-2.278e-05
0	0	0	0	-2.461e-05	-2.354e-05	-2.349e-05	-2.297e-05	-2.025e-05	-2.051e-05	-2.318e-05	-2.452e-05	-2.475e-05	-2.724e-05	-2.223e-05	-2.131e-05	-2.625e-05	-2.377e-05	-2.576e-05	-2.726e-05	-2.372e-05	-2.634e-05	-2.294e-05	-2.348e-05	-2.139e-05	-2.401e-05	-2.841e-05	-2.417e-05	-2.466e-05	-2.789e-05	-2.214e-05	-2.39e-05	-2.462e-05	-2.515e-05	-2.355e-05	-2.146e-05	-2.442e-05	-2.288e-05	-2.618e-05	-2.253e-05	-2.614e-05	-2.495e-05	-2.385e-05	-2.721e-05	-2.279e-05	-2.254e-05	-2.586e-05	-2.277e-05	-2.453e-05	-2.796e-05
1	0	0	0	-1.781e-05	-1.982e-05	-1.598e-05	-1.662e-05	-2.054e-05	-2.051e-05	-1.653e-05	-2.03e-05	-2.226e-05	-2.131e-05	-1.982e-05	-1.648e-05	-1.594e-05	-1.904e-05	-1.944e-05	-1.838e-05	-1.665e-05	-1.443e-05	-1.98e-05	-2.292e-05	-2.23e-05	-2.542e-05	-2.211e-05	-2.078e-05	-1.802e-05	-1.448e-05	-1.922e-05	-1.897e-05	-2.032e-05	-1.978e-05	-1.963e-05	-1.552e-05	-1.896e-05	-1.753e-05	-1.666e-05	-1.914e-05	-1.999e-05	-2.209e-05	-2.154e-05	-1.912e-05	-2.092e-05	-2.035e-05	-2.357e-05	-2.336e-05	-1.868e-05	-1.737e-05
0	0	0	0	-2.324e-05	-2.084e-05	-2.181e-05	-2.107e-05	-2.147e-05	-2e-05	-2.147e-05	-2.487e-05	-2.062e-05	-2.376e-05	-2.154e-05	-2.363e-05	-2.497e-05	-2.53e-05	-2.308e-05	-2.361e-05	-2.357e-05	-2.263e-05	-2.352e-05	-2.283e-05	-2.378e-05	-2.092e-05	-2.168e-05	-2.04e-05	-2e-05	-2.271e-05	-2.238e-05	-2.267e-05	-2.144e-05	-2.423e-05	-2.426e-05	-2.208e-05	-2.339e-05	-2.496e-05	-2.428e-05	-2.401e-05	-2.46e-05	-2.136e-05	-2.081e-05	-2.082e-05	-2.384e-05	-2.423e-05	-2.334e-05	-2.27e-05	-2.101e-05	-2.2e-05
1	0	0	0	-1.551e-05	-1.366e-05	-1.325e-05	-1.236e-05	-1.333e-05	-1.414e-05	-1.447e-05	-1.433e-05	-1.51e-05	-1.199e-05	-1.434e-05	-1.338e-05	-1.518e-05	-1.298e-05	-1.189e-05	-1.177e-05	-1.249e-05	-1.405e-05	-1.211e-05	-1.471e-05	-1.277e-05	-9.56e-06	-1.478e-05	-1.431e-05	-1.461e-05	-1.073e-05	-1.136e-05	-1.04e-05	-1.236e-05	-1.46e-05	-1.609e-05	-1.3e-05	-1.534e-05	-1.334e-05	-1.385e-05	-1.28e-05	-1.282e-05	-1.495e-05	-1.265e-05	-1.67e-05	-1.86e-05	-1.4e-05	-1.617e-05	-1.492e-05	-1.444e-05	-1.473e-05
0	0	0	0	-1.157e-05	-1.93e-05	-1.996e-05	-1.675e-05	-1.581e-05	-1.565e-05	-1.619e-05	-1.63e-05	-1.43e-05	-2.07e-05	-1.526e-05	-1.806e-05	-1.351e-05	-1.575e-05	-1.725e-05	-1.527e-05	-1.531e-05	-2.044e-05	-1.592e-05	-1.8e-05	-1.642e-05	-1.921e-05	-1.781e-05	-1.979e-05	-1.597e-05	-2.023e-05	-1.987e-05	-2.347e-05	-1.746e-05	-1.939e-05	-1.88e-05	-1.804e-05	-1.669e-05	-1.639e-05	-1.649e-05	-2.025e-05	-2.251e-05	-2.107e-05	-1.752e-05	-1.432e-05	-1.323e-05	-2.132e-05	-1.781e-05	-1.979e-05	-2.278e-05	-1.154e-05
1	0	0	0	-1.945e-05	-1.912e-05	-2.126e-05	-2.424e-05	-2.437e-05	-1.971e-05	-1.987e-05	-2.137e-05	-2.245e-05	-2.433e-05	-2.374e-05	-2.32e-05	-2.088e-05	-2.281e-05	-2.15e-05	-2.434e-05	-2.126e-05	-1.902e-05	-1.658e-05	-2.406e-05	-2.164e-05	-2.623e-05	-2.443e-05	-1.972e-05	-2.301e-05	-2.652e-05	-2.192e-05	-1.702e-05	-1.804e-05	-2.174e-05	-2.409e-05	-2.301e-05	-2.233e-05	-1.978e-05	-2.546e-05	-2.454e-05	-2.308e-05	-1.958e-05	-2.101e-05	-2.123e-05	-2.578e-05	-2.065e-05	-2.094e-05	-2.004e-05	-1.85e-05	-2.403e-05
0	0	0	0	-1.316e-05	-1.349e-05	-1.782e-05	-1.749e-05	-1.622e-05	-1.685e-05	-1.276e-05	-1.383e-05	-1.548e-05	-1.427e-05	-1.333e-05	-1.676e-05	-1.546e-05	-1.52e-05	-1.74e-05	-1.706e-05	-1.802e-05	-1.672e-05	-1.762e-05	-1.713e-05	-1.645e-05	-1.294e-05	-1.481e-05	-1.381e-05	-1.598e-05	-1.674e-05	-1.94e-05	-1.841e-05	-1.892e-05	-1.75e-05	-1.71e-05	-1.69e-05	-1.687e-05	-1.716e-05	-1.61e-05	-1.717e-05	-1.685e-05	-1.787e-05	-1.391e-05	-1.588e-05	-1.779e-05	-1.664e-05	-1.713e-05	-1.67e-05	-1.675e-05	-1.677e-05
1	0	0	0	-8.87e-06	-1.312e-05	-8.92e-06	-9.24e-06	-7.16e-06	-1.113e-05	-1.336e-05	-7.75e-06	-9.02e-06	-1.038e-05	-1.198e-05	-1.184e-05	-8.42e-06	-1.054e-05	-1.194e-05	-5.33e-06	-1.347e-05	-1.162e-05	-1.17e-05	-1.008e-05	-1.059e-05	-1.075e-05	-9.29e-06	-1.247e-05	-9.17e-06	-8.41e-06	-1.152e-05	-1.139e-05	-1.726e-05	-1.452e-05	-1.395e-05	-9.68e-06	-7.23e-06	-8.39e-06	-1.303e-05	-1.188e-05	-1.178e-05	-1.509e-05	-1.414e-05	-1.253e-05	-1.212e-05	-1.288e-05	-1.231e-05	-5.79e-06	-6.39e-06	-1.05e-05
1	0	0	0	-1.309e-05	-1.153e-05	-8.84e-06	-7.7e-06	-1.145e-05	-1.176e-05	-1.592e-05	-1.701e-05	-1.294e-05	-1.181e-05	-1.193e-05	-6.94e-06	-6.91e-06	-9.83e-06	-8.69e-06	-6.76e-06	-1.111e-05	-1.545e-05	-1.359e-05	-1.22e-05	-6.38e-06	-7.41e-06	-1.017e-05	-1.173e-05	-1.011e-05	-1.218e-05	-1.324e-05	-1.619e-05	-1.578e-05	-1.337e-05	-1.119e-05	-8.79e-06	-1.07e-05	-1.123e-05	-8.59e-06	-8.69e-06	-1.285e-05	-1.024e-05	-8.98e-06	-9.47e-06	-1.256e-05	-1.173e-05	-1.29e-05	-1.031e-05	-1.306e-05	-1.521e-05
0	0	0	0	-1.647e-05	-1.5e-05	-1.398e-05	-1.417e-05	-1.224e-05	-1.094e-05	-1.441e-05	-1.596e-05	-1.204e-05	-1.318e-05	-1.211e-05	-1.126e-05	-1.1e-05	-1.315e-05	-1.234e-05	-1.342e-05	-1.488e-05	-1.052e-05	-1.359e-05	-1.204e-05	-1.2e-05	-1.082e-05	-9.44e-06	-1.202e-05	-1.143e-05	-1.193e-05	-1.19e-05	-1.357e-05	-1.133e-05	-1.408e-05	-1.449e-05	-1.254e-05	-1.253e-05	-1.192e-05	-1.429e-05	-1.377e-05	-1.33e-05	-1.387e-05	-1.437e-05	-1.463e-05	-1.352e-05	-1.318e-05	-1.35e-05	-1.322e-05	-1.343e-05	-1.19e-05
1	0	0	0	-1.743e-05	-8.22e-06	-4.53e-06	-1.712e-05	-1.924e-05	-1.361e-05	-1.262e-05	-1.102e-05	-1.967e-05	-2.152e-05	-1.533e-05	-1.329e-05	-1.426e-05	-1.415e-05	-1.114e-05	-1.479e-05	-1.611e-05	-1.337e-05	-1.193e-05	-1.214e-05	-1.01e-05	-8.65e-06	-1.473e-05	-2.135e-05	-1.922e-05	-1.487e-05	-9.78e-06	-1.238e-05	-1.455e-05	-1.13e-05	-3.08e-06	-7.95e-06	-1.294e-05	-9.77e-06	-9.9e-06	-1.274e-05	-1.884e-05	-8.67e-06	-1.204e-05	-1.918e-05	-9.87e-06	-7.3e-06	-1.511e-05	-1.579e-05	-1.012e-05	-8.67e-06
0	0	0	0	-1.69e-05	-1.805e-05	-1.527e-05	-1.607e-05	-1.597e-05	-1.859e-05	-1.709e-05	-1.44e-05	-1.349e-05	-1.512e-05	-1.549e-05	-1.578e-05	-1.598e-05	-1.735e-05	-1.777e-05	-1.619e-05	-1.715e-05	-1.522e-05	-1.589e-05	-1.56e-05	-1.636e-05	-1.412e-05	-1.572e-05	-1.558e-05	-1.685e-05	-1.829e-05	-1.396e-05	-1.458e-05	-1.528e-05	-1.678e-05	-2.051e-05	-1.941e-05	-1.588e-05	-1.736e-05	-1.811e-05	-1.41e-05	-1.644e-05	-1.356e-05	-1.512e-05	-1.58e-05	-1.76e-05	-1.931e-05	-1.838e-05	-1.649e-05	-1.549e-05	-1.548e-05
1	0	0	0	-1.047e-05	-1.289e-05	-1.638e-05	-1.499e-05	-1.582e-05	-1.311e-05	-1.229e-05	-1.328e-05	-1.393e-05	-1.188e-05	-1.307e-05	-1.334e-05	-1.55e-05	-1.324e-05	-8.64e-06	-1.299e-05	-1.462e-05	-1.536e-05	-1.516e-05	-1.283e-05	-1.313e-05	-1.376e-05	-1.256e-05	-9.85e-06	-1.181e-05	-1.286e-05	-1.108e-05	-1.058e-05	-1.579e-05	-1.398e-05	-1.457e-05	-1.356e-05	-1.09e-05	-1.275e-05	-1.352e-05	-1.253e-05	-1.201e-05	-1.189e-05	-1.224e-05	-1.298e-05	-1.484e-05	-1.446e-05	-1.644e-05	-1.481e-05	-1.509e-05	-1.389e-05
0	0	0	0	-2.465e-05	-2.089e-05	-2.169e-05	-2.244e-05	-2.229e-05	-2.12e-05	-2.092e-05	-2.315e-05	-2.512e-05	-2.462e-05	-2.134e-05	-2.252e-05	-2.324e-05	-2.357e-05	-2.481e-05	-2.496e-05	-2.318e-05	-2.125e-05	-2.172e-05	-2.408e-05	-2.482e-05	-2.214e-05	-2.342e-05	-2.276e-05	-2.226e-05	-2.163e-05	-2.631e-05	-2.482e-05	-2.111e-05	-2.274e-05	-2.157e-05	-2.385e-05	-2.28e-05	-2.021e-05	-2.176e-05	-2.295e-05	-2.318e-05	-2.177e-05	-2.15e-05	-2.111e-05	-2.373e-05	-2.343e-05	-2.558e-05	-2.519e-05	-2.257e-05	-2.472e-05
1	0	0	0	-1.722e-05	-1.687e-05	-1.561e-05	-1.194e-05	-1.235e-05	-1.593e-05	-1.565e-05	-1.33e-05	-1.322e-05	-1.167e-05	-1.138e-05	-1.298e-05	-1.238e-05	-1.307e-05	-1.286e-05	-1.407e-05	-1.658e-05	-1.542e-05	-1.561e-05	-1.435e-05	-1.418e-05	-1.295e-05	-1.416e-05	-1.577e-05	-1.53e-05	-1.623e-05	-1.514e-05	-1.677e-05	-1.673e-05	-1.621e-05	-1.522e-05	-1.421e-05	-1.225e-05	-1.354e-05	-1.451e-05	-1.53e-05	-1.457e-05	-1.603e-05	-1.548e-05	-1.616e-05	-1.549e-05	-1.437e-05	-1.518e-05	-1.329e-05	-1.491e-05	-1.487e-05
0	0	0	0	-2.498e-05	-2.548e-05	-2.46e-05	-2.622e-05	-2.597e-05	-2.035e-05	-2.65e-05	-2.646e-05	-2.7e-05	-2.536e-05	-2.668e-05	-2.423e-05	-2.244e-05	-2.503e-05	-2.619e-05	-2.27e-05	-2.556e-05	-2.656e-05	-2.349e-05	-2.279e-05	-2.294e-05	-2.517e-05	-2.534e-05	-2.364e-05	-2.289e-05	-2.493e-05	-2.673e-05	-2.178e-05	-2.581e-05	-2.762e-05	-2.953e-05	-2.765e-05	-2.539e-05	-2.6e-05	-2.691e-05	-2.858e-05	-2.592e-05	-2.679e-05	-2.546e-05	-2.411e-05	-2.193e-05	-2.711e-05	-2.365e-05	-2.439e-05	-2.925e-05	-2.822e-05
0	1	0	0	-1.428e-05	-1.444e-05	-1.972e-05	-1.856e-05	-2.371e-05	-1.841e-05	-1.675e-05	-1.642e-05	-1.646e-05	-1.595e-05	-1.658e-05	-1.876e-05	-1.447e-05	-1.467e-05	-1.939e-05	-1.835e-05	-1.895e-05	-1.711e-05	-1.724e-05	-1.67e-05	-1.585e-05	-1.928e-05	-1.856e-05	-1.768e-05	-1.464e-05	-1.994e-05	-1.94e-05	-2.069e-05	-1.826e-05	-1.628e-05	-1.772e-05	-1.866e-05	-2.041e-05	-1.881e-05	-1.823e-05	-1.831e-05	-1.788e-05	-1.64e-05	-1.752e-05	-1.866e-05	-2.18e-05	-2.068e-05	-1.913e-05	-1.931e-05	-1.999e-05	-1.92e-05
0	0	0	0	-1.002e-05	-6.3e-06	-1.204e-05	-5.92e-06	-1.223e-05	-1.571e-05	-1.679e-05	-1.296e-05	-1.314e-05	-1.197e-05	-8.5e-06	-1.753e-05	-1.908e-05	-1.062e-05	-6.94e-06	-5.83e-06	-2.29e-06	-4.97e-06	-8.9e-06	-1.069e-05	-9.09e-06	-1.253e-05	-1.948e-05	-1.461e-05	-1.52e-05	-1.118e-05	-1.522e-05	-1.215e-05	-7.78e-06	-9.98e-06	-1.651e-05	-1.846e-05	-1.707e-05	-1.198e-05	-7.62e-06	-1.075e-05	-1.136e-05	-9.53e-06	-1.625e-05	-1.66e-05	-1.895e-05	-1.956e-05	-1.494e-05	-1.255e-05	-1.595e-05	-1.747e-05
0	1	0	0	-1.176e-05	-1.194e-05	-1.485e-05	-1.494e-05	-1.302e-05	-1.261e-05	-1.163e-05	-1.356e-05	-1.329e-05	-1.346e-05	-1.3e-05	-1.125e-05	-1.042e-05	-1.061e-05	-1.303e-05	-1.432e-05	-1.447e-05	-1.213e-05	-1.282e-05	-1.217e-05	-1.499e-05	-1.538e-05	-1.256e-05	-1.158e-05	-1.284e-05	-1.347e-05	-1.47e-05	-1.427e-05	-1.248e-05	-1.234e-05	-1.375e-05	-1.647e-05	-1.54e-05	-1.769e-05	-1.438e-05	-1.269e-05	-1.482e-05	-1.485e-05	-1.765e-05	-1.445e-05	-1.264e-05	-1.418e-05	-1.263e-05	-1.24e-05	-1.527e-05	-1.419e-05
0	0	0	0	-1.121e-05	-1.439e-05	-1.055e-05	-9.65e-06	-1.309e-05	-9.59e-06	-1.117e-05	-1.196e-05	-1.071e-05	-1.169e-05	-8.68e-06	-1.036e-05	-1.215e-05	-1.079e-05	-8.66e-06	-1.178e-05	-1.353e-05	-9.84e-06	-1.194e-05	-1.002e-05	-1.135e-05	-1.294e-05	-1.036e-05	-9.67e-06	-1.089e-05	-1.368e-05	-1.286e-05	-1.399e-05	-1.315e-05	-1.238e-05	-1.481e-05	-1.146e-05	-1.208e-05	-1.065e-05	-1.139e-05	-1.183e-05	-1.184e-05	-1.149e-05	-1.103e-05	-1.228e-05	-1.118e-05	-1.041e-05	-8.85e-06	-9.23e-06	-9.69e-06	-1.14e-05
0	1	0	0	-5.31e-06	-6.98e-06	-1.061e-05	-8.07e-06	-1.013e-05	-7.95e-06	-6.91e-06	-1.125e-05	-1.04e-05	-1.013e-05	-1.098e-05	-1.048e-05	-1.152e-05	-9.26e-06	-1.411e-05	-1.077e-05	-1e-05	-6.42e-06	-8.61e-06	-7.43e-06	-8.69e-06	-7.16e-06	-1.02e-05	-1.098e-05	-1.177e-05	-1.18e-05	-1.353e-05	-1.458e-05	-1.448e-05	-1.204e-05	-8.51e-06	-1.181e-05	-1.282e-05	-1.02e-05	-1.109e-05	-1.042e-05	-9.39e-06	-1.273e-05	-1.335e-05	-1.426e-05	-1.345e-05	-1.244e-05	-1.163e-05	-1.158e-05	-1.384e-05	-1.203e-05
0	0	0	0	-7.39e-06	-8.76e-06	-1.019e-05	-1.515e-05	-6.69e-06	-9.91e-06	-6.53e-06	-6.06e-06	-6.17e-06	-8.12e-06	-8.96e-06	-7.7e-06	-5.17e-06	-6.2e-06	-7.52e-06	-6.57e-06	-1.097e-05	-1.161e-05	-5.22e-06	-1.092e-05	-1.545e-05	-7.61e-06	-7.77e-06	-8.05e-06	-1.378e-05	-1.315e-05	-1.44e-05	-1.311e-05	-1.403e-05	-1.323e-05	-1.29e-05	-1.137e-05	-1.099e-05	-1.713e-05	-1.173e-05	-1.101e-05	-1.051e-05	-5.57e-06	-6.32e-06	-8.22e-06	-1.662e-05	-1.572e-05	-1.244e-05	-1.27e-05	-1.277e-05	-6.66e-06
0	1	0	0	-6.16e-06	-8.12e-06	-1.245e-05	-8.96e-06	-9.76e-06	-1.239e-05	-1.216e-05	-1.004e-05	-1.246e-05	-1.025e-05	-1.093e-05	-9.3e-06	-1.463e-05	-1.543e-05	-7.27e-06	-7.76e-06	-9.84e-06	-1.104e-05	-8.37e-06	-5.93e-06	-6.76e-06	-8.44e-06	-1.448e-05	-1.317e-05	-1.358e-05	-1.006e-05	-6.54e-06	-1.111e-05	-1.004e-05	-1.378e-05	-1.127e-05	-9.79e-06	-8.29e-06	-1.471e-05	-1.245e-05	-1.019e-05	-7.37e-06	-1.096e-05	-1.101e-05	-1.043e-05	-1.04e-05	-1.085e-05	-1.234e-05	-1.368e-05	-9.95e-06	-1.16e-05
0	0	0	0	-2.593e-05	-2.454e-05	-2.658e-05	-2.591e-05	-2.898e-05	-2.818e-05	-2.72e-05	-2.803e-05	-2.667e-05	-2.633e-05	-2.85e-05	-2.581e-05	-2.909e-05	-2.755e-05	-2.837e-05	-2.941e-05	-2.935e-05	-2.995e-05	-2.811e-05	-2.744e-05	-2.812e-05	-2.832e-05	-3.012e-05	-2.779e-05	-2.628e-05	-2.542e-05	-2.757e-05	-2.741e-05	-2.704e-05	-2.875e-05	-2.736e-05	-2.729e-05	-2.761e-05	-2.6e-05	-2.776e-05	-2.759e-05	-2.739e-05	-2.709e-05	-2.946e-05	-2.847e-05	-2.82e-05	-2.887e-05	-2.772e-05	-2.71e-05	-2.842e-05	-2.815e-05
0	1	0	0	-3.11e-05	-1.093e-05	-9.84e-06	-1.736e-05	4.6e-07	-5.35e-06	6.67e-06	1.368e-05	5.84e-06	-1.453e-05	-1.251e-05	5.1e-07	1.445e-05	-2.981e-05	-3.59e-05	-6.13e-06	-7.16e-06	2.3e-06	9.96e-06	4.38e-06	-2.76e-06	1.849e-05	4.37e-06	-2.589e-05	5.26e-06	6.64e-06	-8.13e-06	-2.573e-05	-1.835e-05	-2.9e-06	1.213e-05	9.17e-06	8.1e-07	1.965e-05	4.51e-06	-1.514e-05	-1.628e-05	-2.643e-05	1.674e-05	1.304e-05	1.402e-05	-4.59e-06	-1.134e-05	2.173e-05	1.604e-05	-1.807e-05
0	0	0	0	-1.854e-05	-2.22e-05	-2.048e-05	-2.253e-05	-2.496e-05	-2.306e-05	-2.467e-05	-2.154e-05	-2.39e-05	-2.143e-05	-2.086e-05	-2.116e-05	-2.172e-05	-2.451e-05	-2.032e-05	-2.445e-05	-2.383e-05	-2.01e-05	-2.581e-05	-2.964e-05	-2.432e-05	-2.246e-05	-2.222e-05	-2.407e-05	-2.873e-05	-2.831e-05	-2.458e-05	-1.934e-05	-2.347e-05	-2.012e-05	-2.4e-05	-2.504e-05	-2.514e-05	-3.068e-05	-2.439e-05	-2.238e-05	-1.947e-05	-1.605e-05	-1.682e-05	-2.043e-05	-2.022e-05	-1.961e-05	-2.329e-05	-2.705e-05	-2.444e-05	-2.704e-05
0	1	0	0	-6.93e-06	-1.174e-05	-8.56e-06	-1.123e-05	-1.28e-05	-1.345e-05	-1.387e-05	-1.262e-05	-1.197e-05	-1.286e-05	-1.227e-05	-8.5e-06	-1.054e-05	-1.153e-05	-1.093e-05	-9.38e-06	-8.87e-06	-8.98e-06	-1.071e-05	-1.111e-05	-1.514e-05	-8.89e-06	-7.95e-06	-1.027e-05	-9.68e-06	-8.1e-06	-1.087e-05	-9.71e-06	-1.325e-05	-1.474e-05	-1.081e-05	-1.104e-05	-1.24e-05	-1.153e-05	-1.318e-05	-1.243e-05	-9.2e-06	-9.68e-06	-1.081e-05	-8.29e-06	-4.57e-06	-7.99e-06	-1.002e-05	-1.036e-05	-1.376e-05	-1.501e-05
0	0	0	0	-1.399e-05	-1.342e-05	-1.237e-05	-1.386e-05	-1.169e-05	-1.253e-05	-1.308e-05	-1.157e-05	-1.373e-05	-1.473e-05	-1.354e-05	-1.248e-05	-1.353e-05	-1.423e-05	-1.376e-05	-1.156e-05	-1.278e-05	-1.441e-05	-1.34e-05	-1.393e-05	-1.276e-05	-1.329e-05	-1.428e-05	-1.388e-05	-1.512e-05	-1.425e-05	-1.63e-05	-1.514e-05	-1.234e-05	-1.17e-05	-1.189e-05	-1.185e-05	-1.28e-05	-1.492e-05	-1.159e-05	-1.246e-05	-1.206e-05	-1.099e-05	-1.32e-05	-1.403e-05	-1.466e-05	-1.332e-05	-1.467e-05	-1.478e-05	-1.412e-05	-1.254e-05
0	1	0	0	-1.769e-05	-1.75e-05	-1.992e-05	-1.87e-05	-1.782e-05	-1.644e-05	-1.888e-05	-1.619e-05	-1.474e-05	-1.496e-05	-1.634e-05	-1.645e-05	-1.801e-05	-1.743e-05	-1.769e-05	-2.028e-05	-1.979e-05	-1.723e-05	-1.762e-05	-1.641e-05	-1.446e-05	-1.738e-05	-1.92e-05	-1.866e-05	-1.787e-05	-1.679e-05	-1.579e-05	-1.765e-05	-2.075e-05	-2.028e-05	-1.943e-05	-1.97e-05	-1.787e-05	-1.929e-05	-1.978e-05	-1.861e-05	-1.729e-05	-1.781e-05	-1.73e-05	-1.748e-05	-1.698e-05	-1.764e-05	-1.84e-05	-1.622e-05	-1.801e-05	-1.902e-05
0	0	0	0	-5.36e-06	-3.83e-06	-3.73e-06	-3.25e-06	-7.18e-06	-1.061e-05	-9.87e-06	-6.04e-06	-9.58e-06	-1.088e-05	-1.355e-05	-7.04e-06	-7.92e-06	-1.846e-05	-1.262e-05	-6.2e-06	-1.504e-05	-1.118e-05	-7.06e-06	-8.03e-06	-1.474e-05	-1.053e-05	-4.28e-06	-1.756e-05	-1.739e-05	-2.095e-05	-1.918e-05	-1.9e-05	-7.84e-06	-1.293e-05	-9.67e-06	-3.4e-07	-1.184e-05	-1.663e-05	-7.26e-06	-3.24e-06	-9.73e-06	-6.55e-06	-9.37e-06	-4.14e-06	-9.05e-06	-8.17e-06	-9.55e-06	-1.486e-05	-9.26e-06	-1.218e-05
0	1	0	0	-2.102e-05	-2.332e-05	-1.956e-05	-1.998e-05	-2.315e-05	-2.287e-05	-2.107e-05	-2.16e-05	-2.09e-05	-1.892e-05	-1.717e-05	-2.127e-05	-2.378e-05	-2.214e-05	-2.206e-05	-1.961e-05	-2.084e-05	-2.072e-05	-2.11e-05	-2.243e-05	-1.904e-05	-2.03e-05	-2.274e-05	-2.483e-05	-2.528e-05	-2.455e-05	-1.966e-05	-2.346e-05	-2.455e-05	-2.542e-05	-2.212e-05	-2.142e-05	-2.199e-05	-1.937e-05	-2.142e-05	-2.364e-05	-2.24e-05	-2.173e-05	-2.378e-05	-2.209e-05	-1.844e-05	-2.202e-05	-1.974e-05	-2.139e-05	-2.177e-05	-2.325e-05
0	0	0	0	-7.47e-06	-9.12e-06	-8.69e-06	-6.96e-06	-3.95e-06	-6.1e-06	-7.43e-06	-8.99e-06	-8.82e-06	-6.63e-06	-1.95e-06	-3.32e-06	-6.55e-06	-1.18e-05	-1.112e-05	-1.04e-05	-1.232e-05	-9.86e-06	-9.34e-06	-7.18e-06	-6.26e-06	-4.52e-06	-9.39e-06	-8.25e-06	-9.85e-06	-1.135e-05	-1.314e-05	-1.329e-05	-1.327e-05	-6.78e-06	-9.93e-06	-5.29e-06	-1.079e-05	-6.02e-06	-9.49e-06	-9.29e-06	-7.87e-06	-7.29e-06	-1.165e-05	-8.28e-06	-6.03e-06	-7.91e-06	-7.44e-06	-4.79e-06	-9.12e-06	-5.58e-06
0	1	0	0	-1.535e-05	-1.374e-05	-1.162e-05	-1.146e-05	-1.498e-05	-1.662e-05	-1.069e-05	-1.5e-05	-1.205e-05	-1.205e-05	-1.028e-05	-1.484e-05	-1.248e-05	-1.068e-05	-1.249e-05	-1.44e-05	-1.656e-05	-1.421e-05	-1.339e-05	-1.432e-05	-1.362e-05	-1.325e-05	-1.047e-05	-8.69e-06	-1.072e-05	-8.63e-06	-1.165e-05	-1.572e-05	-1.399e-05	-1.31e-05	-1.524e-05	-1.186e-05	-1.68e-05	-1.834e-05	-1.291e-05	-1.347e-05	-1.645e-05	-1.781e-05	-1.709e-05	-1.649e-05	-1.348e-05	-1.198e-05	-1.62e-05	-1.51e-05	-1.715e-05	-1.686e-05
0	0	0	0	-3.358e-05	-3.298e-05	-3.365e-05	-3.419e-05	-3.552e-05	-3.038e-05	-2.689e-05	-2.828e-05	-2.612e-05	-2.813e-05	-3.336e-05	-2.951e-05	-3.199e-05	-3.023e-05	-3.238e-05	-3.483e-05	-3.485e-05	-3.395e-05	-3.264e-05	-3.511e-05	-3.515e-05	-3.407e-05	-3.49e-05	-3.485e-05	-2.996e-05	-2.824e-05	-2.935e-05	-3.5e-05	-3.275e-05	-2.836e-05	-3.162e-05	-3.248e-05	-3.383e-05	-3.332e-05	-3.31e-05	-3.33e-05	-3.272e-05	-3.116e-05	-3.222e-05	-3.679e-05	-3.272e-05	-3.251e-05	-3.038e-05	-3.413e-05	-3.277e-05	-3.485e-05
0	1	0	0	-1.544e-05	-1.55e-05	-1.637e-05	-1.536e-05	-1.63e-05	-1.42e-05	-1.219e-05	-1.276e-05	-1.32e-05	-1.335e-05	-1.51e-05	-1.582e-05	-1.393e-05	-1.416e-05	-1.509e-05	-1.572e-05	-1.582e-05	-1.459e-05	-1.584e-05	-1.533e-05	-1.492e-05	-1.777e-05	-1.517e-05	-1.65e-05	-1.328e-05	-1.176e-05	-1.482e-05	-1.426e-05	-1.584e-05	-1.598e-05	-1.278e-05	-1.32e-05	-1.498e-05	-1.691e-05	-1.566e-05	-1.752e-05	-1.788e-05	-1.595e-05	-1.323e-05	-1.376e-05	-1.458e-05	-1.45e-05	-1.618e-05	-1.44e-05	-1.478e-05	-1.213e-05
0	0	0	0	-2.332e-05	-2.352e-05	-2.363e-05	-2.315e-05	-2.298e-05	-2.335e-05	-2.515e-05	-2.408e-05	-2.33e-05	-2.459e-05	-2.434e-05	-2.35e-05	-2.389e-05	-2.497e-05	-2.61e-05	-2.45e-05	-2.61e-05	-2.399e-05	-2.732e-05	-2.521e-05	-2.32e-05	-2.313e-05	-2.437e-05	-2.627e-05	-2.444e-05	-2.287e-05	-2.351e-05	-2.416e-05	-2.492e-05	-2.443e-05	-2.492e-05	-2.474e-05	-2.603e-05	-2.464e-05	-2.512e-05	-2.48e-05	-2.273e-05	-2.598e-05	-2.722e-05	-2.638e-05	-2.523e-05	-2.56e-05	-2.404e-05	-2.647e-05	-2.678e-05	-2.86e-05
0	0	0	0	-1.87e-05	-1.783e-05	-1.833e-05	-1.724e-05	-1.443e-05	-1.633e-05	-1.812e-05	-1.964e-05	-2.194e-05	-1.748e-05	-1.653e-05	-2.133e-05	-1.892e-05	-1.46e-05	-1.631e-05	-1.761e-05	-2.046e-05	-1.859e-05	-1.986e-05	-2.097e-05	-1.601e-05	-2.096e-05	-1.96e-05	-1.51e-05	-1.903e-05	-1.888e-05	-2.021e-05	-2.441e-05	-2.101e-05	-1.634e-05	-1.978e-05	-1.628e-05	-1.643e-05	-2.061e-05	-1.593e-05	-1.521e-05	-1.893e-05	-1.893e-05	-2.185e-05	-1.919e-05	-1.769e-05	-1.952e-05	-2.1e-05	-2.04e-05	-2.121e-05	-1.761e-05
0	0	1	0	-1.52e-06	-6.08e-06	-4.89e-06	-3.91e-06	-6.42e-06	-8.25e-06	-1.42e-05	-6.95e-06	-6.95e-06	-6.48e-06	-4.71e-06	-1.22e-06	-8.1e-07	-2.79e-06	-1.48e-06	1.51e-06	-7.91e-06	-1.265e-05	-9.95e-06	-1.057e-05	-4.78e-06	-1.418e-05	-1.275e-05	-8.42e-06	-2.55e-06	-2.12e-06	1.32e-06	-3.52e-06	-5.47e-06	-7.61e-06	-4.13e-06	-6.1e-07	-7.37e-06	-7.44e-06	-1.124e-05	-7.29e-06	-7.06e-06	-2.58e-06	-7.77e-06	-1e-07	-2.13e-06	-9.51e-06	-7.75e-06	-7.87e-06	-1e-05	-1.72e-06
0	0	0	0	-6.03e-06	-1.641e-05	-1.656e-05	-1.29e-05	-1.827e-05	-1.172e-05	-2.269e-05	-2.734e-05	-1.361e-05	2.57e-06	-1.175e-05	-1.203e-05	3.37e-06	-2.099e-05	-1.972e-05	-8.35e-06	-6.09e-06	-1.269e-05	-3.31e-06	-1.722e-05	-3.114e-05	-1.466e-05	-1.974e-05	-4.19e-06	-1.331e-05	-9.23e-06	-1.023e-05	-2.056e-05	-1.928e-05	-2.368e-05	-2.602e-05	-2.702e-05	-1.926e-05	-1.991e-05	-1.69e-05	-1.652e-05	-1.772e-05	-2.27e-05	-2.179e-05	-1.632e-05	-2.709e-05	-2.967e-05	-2.722e-05	-1.181e-05	-1.923e-05	-8.96e-06
0	0	1	0	-6.57e-06	-9.33e-06	-5.85e-06	-9.45e-06	-8.91e-06	-8.49e-06	-9.01e-06	-1.516e-05	-1.279e-05	-1.125e-05	-1.298e-05	-6.13e-06	-1.19e-05	-1.591e-05	-1.411e-05	-1.524e-05	-1.344e-05	-1.232e-05	-1.312e-05	-1.356e-05	-6.01e-06	-7.15e-06	-1.789e-05	-1.197e-05	-1.246e-05	-1.313e-05	-1.899e-05	-1.338e-05	-1.814e-05	-1.364e-05	-1.305e-05	-1.228e-05	-1.063e-05	-1.183e-05	-1.728e-05	-1.633e-05	-1.146e-05	-1.303e-05	-1.447e-05	-5.72e-06	-1.057e-05	-1.317e-05	-1.512e-05	-1.26e-05	-1.016e-05	-1.328e-05
0	0	0	0	-2.07e-05	-2.526e-05	-2.607e-05	-2.262e-05	-2.384e-05	-2.586e-05	-2.791e-05	-2.5e-05	-2.362e-05	-2.299e-05	-2.315e-05	-2.51e-05	-2.531e-05	-2.629e-05	-2.767e-05	-2.711e-05	-2.886e-05	-2.731e-05	-2.585e-05	-2.576e-05	-2.711e-05	-2.63e-05	-2.667e-05	-2.826e-05	-2.77e-05	-2.436e-05	-2.621e-05	-2.496e-05	-2.587e-05	-2.556e-05	-2.622e-05	-2.624e-05	-2.518e-05	-2.615e-05	-2.948e-05	-2.581e-05	-2.636e-05	-2.674e-05	-2.446e-05	-2.58e-05	-2.548e-05	-2.647e-05	-2.739e-05	-2.67e-05	-2.734e-05	-2.742e-05
0	0	1	0	-7.31e-06	-5.5e-06	-5.97e-06	-8.6e-06	-2.4e-06	-3.41e-06	-5.71e-06	-4.29e-06	-6.6e-06	-8.7e-06	-9.97e-06	-8.33e-06	-2.09e-06	-5.6e-07	-8.57e-06	-9.18e-06	-1.086e-05	-1.079e-05	-1.544e-05	-9.46e-06	-3.58e-06	-2.12e-06	-8.3e-06	-1.52e-05	-1.351e-05	-1.244e-05	-1.463e-05	-1.08e-05	-1.341e-05	-9.31e-06	-1.011e-05	-1.071e-05	-1.06e-05	-1.315e-05	-1.377e-05	-1.4e-05	-1.19e-05	-1.194e-05	-1.594e-05	-1.104e-05	-8.33e-06	-8.7e-06	-1.243e-05	-8.12e-06	-2.19e-06	-9.37e-06
0	0	0	0	-1.526e-05	-1.213e-05	-8.06e-06	-1.54e-05	-7.45e-06	-1.256e-05	-6.13e-06	-7.78e-06	-4.25e-06	-1.737e-05	-1.685e-05	-1.429e-05	-1.065e-05	-1.508e-05	-1.136e-05	-7.76e-06	-1.178e-05	-1.397e-05	-1.841e-05	-1.998e-05	-1.583e-05	-1.003e-05	-1.139e-05	-1.035e-05	-1.803e-05	-1.843e-05	-1.95e-05	-2.124e-05	-2.123e-05	-2.142e-05	-1.998e-05	-1.279e-05	-2.183e-05	-1.321e-05	-1.301e-05	-8.47e-06	-8.81e-06	-1.185e-05	-1.829e-05	-2.358e-05	-2.242e-05	-1.106e-05	-1.805e-05	-2.123e-05	-1.468e-05	-6.53e-06
0	0	1	0	3.67e-06	-1.443e-05	5.22e-06	-1.895e-05	-3.7e-06	1.631e-05	5.7e-07	5.63e-06	-6.7e-06	-5.7e-06	-9.01e-06	-8.63e-06	-2.59e-06	2.101e-05	-4.01e-06	2.16e-06	7.05e-06	-1.091e-05	-1.95e-05	-1.4e-07	1.336e-05	2.27e-06	-1.465e-05	-1.016e-05	-9.41e-06	4.68e-06	2.133e-05	1.27e-06	1.137e-05	1.859e-05	1.143e-05	-7.5e-07	-2.347e-05	-1.764e-05	-3.059e-05	-3.313e-05	-3.937e-05	-5.04e-06	-3.562e-05	-2.686e-05	-1.386e-05	-1.419e-05	5.41e-06	4.52e-06	2.61e-06	1.087e-05
0	0	0	0	-1.617e-05	-1.711e-05	-1.917e-05	-2.006e-05	-2.044e-05	-2.289e-05	-2.207e-05	-1.999e-05	-2.524e-05	-2.201e-05	-2.16e-05	-2.193e-05	-1.95e-05	-2.042e-05	-2.187e-05	-1.851e-05	-1.767e-05	-2.209e-05	-2.535e-05	-2.496e-05	-2.306e-05	-2.142e-05	-1.94e-05	-1.994e-05	-1.548e-05	-1.688e-05	-1.628e-05	-1.922e-05	-2.1e-05	-1.49e-05	-1.071e-05	-1.389e-05	-1.848e-05	-1.926e-05	-2.28e-05	-2.379e-05	-2.072e-05	-3.141e-05	-2.413e-05	-1.929e-05	-3.197e-05	-3.128e-05	-2.672e-05	-2.083e-05	-1.228e-05	-2.321e-05
0	0	0	0	-2.825e-05	-3.446e-05	-3.508e-05	-2.199e-05	-1.188e-05	-1.836e-05	-1.689e-05	-2.35e-06	-2.916e-05	-2.065e-05	-8.17e-06	-1.081e-05	-1.458e-05	-2.204e-05	-1.317e-05	1.29e-06	2.5e-07	-1.641e-05	-2.652e-05	-2.196e-05	-2.458e-05	-2.79e-06	-2.656e-05	-1.809e-05	-1.37e-05	2.9e-07	3.3e-06	2.77e-06	1.74e-06	-1.333e-05	-1.266e-05	-3.8e-07	-1.927e-05	-1.783e-05	-2.151e-05	-1.63e-06	-4.82e-06	-1.76e-05	-2.462e-05	-1.177e-05	-1.057e-05	-2.329e-05	-1.59e-05	-8.57e-06	-8e-06	1e-07
0	0	1	0	-1.353e-05	-1.38e-05	-1.096e-05	4.88e-06	2.9e-06	-6.05e-06	-1.57e-06	7.47e-06	-3.99e-06	-6.31e-06	-8.03e-06	-6.75e-06	-1.46e-06	1.48e-06	-1.259e-05	-4.93e-06	-5.49e-06	-2.499e-05	-2.569e-05	-1.84e-05	-8.03e-06	-1.083e-05	-2.199e-05	-2.095e-05	-4e-06	-8.76e-06	-1.298e-05	-1.924e-05	-1.211e-05	-1.175e-05	-4.16e-06	-1.981e-05	-2.156e-05	-2.395e-05	-1.545e-05	-9.84e-06	-1.139e-05	-1.645e-05	-6.03e-06	-1.092e-05	-1.48e-05	1.321e-05	-3.89e-06	-1.577e-05	-1.813e-05	-2.496e-05
0	0	1	0	-1.51e-05	-1.47e-05	-1.514e-05	-1.633e-05	-1.565e-05	-1.408e-05	-1.554e-05	-1.487e-05	-1.512e-05	-1.537e-05	-1.512e-05	-1.843e-05	-1.529e-05	-1.513e-05	-1.641e-05	-1.477e-05	-1.446e-05	-1.549e-05	-1.539e-05	-1.749e-05	-1.667e-05	-2.036e-05	-1.875e-05	-1.73e-05	-1.355e-05	-1.445e-05	-1.741e-05	-1.613e-05	-1.536e-05	-1.821e-05	-1.773e-05	-1.594e-05	-1.556e-05	-1.64e-05	-1.594e-05	-1.747e-05	-1.716e-05	-1.688e-05	-1.7e-05	-1.706e-05	-1.522e-05	-1.771e-05	-1.804e-05	-1.687e-05	-1.766e-05	-1.844e-05
0	0	1	0	-2.251e-05	-2.266e-05	-2.211e-05	-2.205e-05	-2.528e-05	-2.305e-05	-2.27e-05	-2.13e-05	-2.048e-05	-2.259e-05	-2.193e-05	-2.018e-05	-2.071e-05	-2.325e-05	-2.371e-05	-2.16e-05	-2.021e-05	-1.983e-05	-2.175e-05	-2.136e-05	-2.304e-05	-2.194e-05	-1.914e-05	-2.221e-05	-2.034e-05	-2.226e-05	-2.349e-05	-2.375e-05	-2.33e-05	-2.428e-05	-2.224e-05	-2.101e-05	-2.2e-05	-2.249e-05	-2.186e-05	-2.449e-05	-2.422e-05	-2.162e-05	-2.093e-05	-2.142e-05	-2.298e-05	-2.292e-05	-2.187e-05	-2.148e-05	-2.232e-05	-2.488e-05
0	0	0	1	-2.359e-05	-2.068e-05	-1.924e-05	-2.244e-05	-2.032e-05	-2.227e-05	-2.258e-05	-2.48e-05	-2.491e-05	-2.339e-05	-1.955e-05	-2.266e-05	-2.516e-05	-2.442e-05	-2.415e-05	-2.47e-05	-2.397e-05	-2.218e-05	-2.41e-05	-2.472e-05	-2.185e-05	-2.261e-05	-2.379e-05	-2.553e-05	-2.537e-05	-2.281e-05	-2.199e-05	-2.412e-05	-2.16e-05	-2.157e-05	-2.217e-05	-2.199e-05	-2.475e-05	-2.316e-05	-2.269e-05	-2.228e-05	-2.361e-05	-2.625e-05	-2.508e-05	-2.342e-05	-2.352e-05	-2.301e-05	-2.361e-05	-2.495e-05	-2.119e-05	-2.237e-05
0	0	0	0	-2.147e-05	-2.513e-05	-2.709e-05	-2.645e-05	-2.426e-05	-2.149e-05	-1.857e-05	-1.9e-05	-2.05e-05	-1.895e-05	-2.326e-05	-2.134e-05	-1.973e-05	-1.817e-05	-1.802e-05	-1.979e-05	-2.054e-05	-1.915e-05	-2.311e-05	-2.479e-05	-2.188e-05	-1.789e-05	-2.091e-05	-1.962e-05	-1.85e-05	-2.409e-05	-2.478e-05	-1.733e-05	-1.406e-05	-1.975e-05	-1.941e-05	-1.596e-05	-2.086e-05	-1.558e-05	-2.456e-05	-2.214e-05	-2.889e-05	-2.905e-05	-2.259e-05	-2.243e-05	-2.431e-05	-2.145e-05	-2.427e-05	-2.943e-05	-2.476e-05	-2.274e-05
0	0	0	1	1.045e-05	-5.31e-06	2.9e-07	1.156e-05	1.374e-05	-6.01e-06	-6.6e-07	1.664e-05	8.3e-07	-1.069e-05	-5.95e-06	-3.94e-06	1.148e-05	-3.49e-06	-7.35e-06	1.03e-06	-1.286e-05	3.3e-06	1.31e-06	-1.131e-05	-2.6e-05	-1.071e-05	5.43e-06	1.426e-05	6.07e-06	7.1e-06	5e-07	1.895e-05	2.107e-05	1.515e-05	-1.117e-05	-1.054e-05	7.2e-06	1.736e-05	9.98e-06	5.91e-06	7.9e-07	-1.699e-05	-7.89e-06	-8.47e-06	-1.87e-06	-5.99e-06	-4.45e-06	6.64e-06	-7.34e-06	-7.52e-06
0	0	0	0	-2.083e-05	-2.114e-05	-1.809e-05	-1.93e-05	-2.222e-05	-2.386e-05	-2.2e-05	-2.178e-05	-2.038e-05	-1.958e-05	-2.109e-05	-2.057e-05	-2.026e-05	-2.105e-05	-2.296e-05	-2.51e-05	-1.983e-05	-2.213e-05	-2.261e-05	-2.627e-05	-2.239e-05	-1.918e-05	-2.151e-05	-2.123e-05	-2.048e-05	-2.236e-05	-2.24e-05	-2.074e-05	-2.011e-05	-2.23e-05	-2.272e-05	-2.49e-05	-2.428e-05	-2.389e-05	-2.057e-05	-2.072e-05	-2.287e-05	-2.168e-05	-2.158e-05	-2.225e-05	-2.455e-05	-2.059e-05	-1.859e-05	-2.266e-05	-2.116e-05	-2.041e-05
0	0	0	1	-3.613e-05	-4.013e-05	-3.297e-05	-3.231e-05	-3.637e-05	-3.98e-05	-4.052e-05	-4.192e-05	-4.576e-05	-3.559e-05	-3.355e-05	-3.809e-05	-3.887e-05	-4.202e-05	-3.976e-05	-3.577e-05	-3.398e-05	-3.26e-05	-3.633e-05	-4.724e-05	-4.552e-05	-4.13e-05	-4.212e-05	-3.778e-05	-4.119e-05	-3.36e-05	-4.071e-05	-3.714e-05	-3.59e-05	-2.994e-05	-3.663e-05	-3.57e-05	-3.513e-05	-3.838e-05	-3.914e-05	-4.137e-05	-3.104e-05	-3.396e-05	-3.548e-05	-3.941e-05	-3.618e-05	-3.844e-05	-3.939e-05	-4.091e-05	-3.809e-05	-3.377e-05
0	0	0	0	-1.771e-05	-1.542e-05	-2.543e-05	-2.026e-05	-1.7e-05	-4.43e-06	-6.42e-06	-1.055e-05	-1.821e-05	-1.162e-05	-1.138e-05	3.1e-06	1.489e-05	5.9e-07	-1.09e-05	-1.618e-05	-4.85e-06	-6.33e-06	2.7e-07	-7.47e-06	-1.529e-05	-5.81e-06	-1.263e-05	-1.268e-05	-1.009e-05	-1.331e-05	-1.085e-05	-1.004e-05	-1.644e-05	-5.46e-06	-1.373e-05	-5.69e-06	7.88e-06	-2.24e-06	-4.36e-06	-2.28e-06	-1.72e-05	-3.2e-06	-1.33e-06	7.52e-06	-5.3e-06	-1.027e-05	-2.096e-05	-1.765e-05	-1.478e-05	-2.724e-05
0	0	0	0	-2.749e-05	-2.89e-05	-2.757e-05	-2.689e-05	-2.755e-05	-2.588e-05	-2.562e-05	-2.872e-05	-2.724e-05	-2.989e-05	-2.838e-05	-2.703e-05	-2.679e-05	-3.053e-05	-3.139e-05	-2.938e-05	-2.842e-05	-2.613e-05	-2.456e-05	-2.616e-05	-2.707e-05	-2.638e-05	-2.673e-05	-2.666e-05	-2.805e-05	-2.99e-05	-2.796e-05	-2.579e-05	-2.735e-05	-2.969e-05	-3.092e-05	-2.882e-05	-2.846e-05	-2.972e-05	-3.065e-05	-2.881e-05	-2.607e-05	-2.97e-05	-3.162e-05	-3.027e-05	-2.926e-05	-3.024e-05	-2.92e-05	-2.944e-05	-3.026e-05	-2.99e-05
0	0	0	0	-1.662e-05	-2.167e-05	-1.838e-05	-1.707e-05	-1.722e-05	-1.629e-05	-1.62e-05	-1.433e-05	-1.91e-05	-2.155e-05	-1.947e-05	-1.743e-05	-2.307e-05	-2.099e-05	-1.893e-05	-2.089e-05	-2.026e-05	-1.644e-05	-2.414e-05	-2.038e-05	-1.838e-05	-1.948e-05	-2.34e-05	-2.15e-05	-2.164e-05	-1.761e-05	-1.941e-05	-1.871e-05	-1.983e-05	-1.743e-05	-1.946e-05	-2.007e-05	-2.264e-05	-2.372e-05	-2.397e-05	-1.959e-05	-1.966e-05	-2.136e-05	-1.922e-05	-1.85e-05	-2.164e-05	-2.174e-05	-1.738e-05	-1.744e-05	-1.833e-05	-1.934e-05
0	0	0	1	-1.934e-05	-1.854e-05	-1.84e-05	-1.755e-05	-2.145e-05	-2.167e-05	-2.265e-05	-2.2e-05	-1.801e-05	-2.009e-05	-2.198e-05	-2.099e-05	-1.811e-05	-2.015e-05	-2.102e-05	-2.36e-05	-2.202e-05	-2.086e-05	-2.143e-05	-2.078e-05	-2.088e-05	-1.982e-05	-2.06e-05	-2.137e-05	-2.077e-05	-2.297e-05	-1.865e-05	-2.192e-05	-2.308e-05	-2.222e-05	-2.094e-05	-2.072e-05	-2.216e-05	-2.103e-05	-1.539e-05	-1.976e-05	-2.209e-05	-2.155e-05	-2.011e-05	-2.028e-05	-2.087e-05	-2.184e-05	-1.763e-05	-2.065e-05	-2.207e-05	-2.082e-05
0	0	0	0	-2.48e-06	-4.23e-06	-1.47e-05	-1.178e-05	-1.508e-05	-8.01e-06	-1.203e-05	-1.318e-05	-9.82e-06	-1.743e-05	-1.247e-05	-9.06e-06	4.6e-07	-9.59e-06	-1.004e-05	-1.534e-05	-6.13e-06	-1.726e-05	-7.25e-06	-1.08e-05	-7.52e-06	5e-06	8e-08	-1.472e-05	-2.328e-05	-1.681e-05	-1.006e-05	-1.422e-05	-4.94e-06	-5.99e-06	-1.744e-05	-1.234e-05	-1.812e-05	-1.33e-05	-3.35e-06	-1.203e-05	-1.261e-05	1.87e-06	-1.217e-05	-1.87e-05	-1.378e-05	-1.191e-05	-1.062e-05	-2.176e-05	-1.604e-05	-1.563e-05
0	0	0	1	-1.612e-05	-1.29e-05	-1.638e-05	-1.688e-05	-1.575e-05	-1.63e-05	-1.588e-05	-2.196e-05	-2.266e-05	-2.225e-05	-2.16e-05	-1.718e-05	-1.591e-05	-2.432e-05	-1.952e-05	-1.76e-05	-1.734e-05	-1.785e-05	-1.648e-05	-2.109e-05	-1.625e-05	-1.727e-05	-1.454e-05	-2.205e-05	-2.487e-05	-2.08e-05	-1.944e-05	-1.931e-05	-2.576e-05	-2.314e-05	-2.233e-05	-1.649e-05	-2.142e-05	-2.73e-05	-2.053e-05	-1.851e-05	-2.04e-05	-1.838e-05	-2.074e-05	-2.116e-05	-1.642e-05	-2.003e-05	-1.943e-05	-2.218e-05	-1.8e-05	-1.636e-05
0	0	0	0	-1.726e-05	-1.547e-05	-1.426e-05	-1.264e-05	-1.346e-05	-1.366e-05	-1.515e-05	-1.688e-05	-1.794e-05	-1.499e-05	-1.384e-05	-1.519e-05	-1.792e-05	-1.472e-05	-1.615e-05	-1.583e-05	-1.748e-05	-1.708e-05	-1.777e-05	-1.655e-05	-1.603e-05	-1.64e-05	-1.635e-05	-1.856e-05	-1.695e-05	-1.673e-05	-1.721e-05	-1.655e-05	-1.675e-05	-1.509e-05	-1.401e-05	-1.535e-05	-1.785e-05	-1.672e-05	-1.744e-05	-1.723e-05	-1.547e-05	-1.575e-05	-1.609e-05	-1.533e-05	-1.73e-05	-1.952e-05	-1.675e-05	-1.593e-05	-1.687e-05	-1.549e-05
0	0	0	1	-1.589e-05	-2.005e-05	-2.167e-05	-1.356e-05	-7.62e-06	-9.62e-06	-5.82e-06	-1.688e-05	-2.048e-05	-1.481e-05	-1.536e-05	-1.715e-05	-2.274e-05	-1.719e-05	-1.692e-05	-2.013e-05	-1.493e-05	-2.294e-05	-2.376e-05	-2.182e-05	-2.415e-05	-2.738e-05	-2.478e-05	-1.777e-05	-1.103e-05	-1.821e-05	-2.107e-05	-1.511e-05	-2.241e-05	-2.093e-05	-9.4e-06	-1.164e-05	-1.798e-05	-2.412e-05	-2.762e-05	-2.289e-05	-2.408e-05	-2.513e-05	-1.803e-05	-2.072e-05	-1.704e-05	-1.707e-05	-2.083e-05	-2.335e-05	-2.08e-05	-2.232e-05
0	0	0	1	-6.63e-06	-8.41e-06	-7.56e-06	-9.49e-06	-9.74e-06	-7.84e-06	-9.83e-06	-8.6e-06	-9.29e-06	-1.246e-05	-1.163e-05	-1.184e-05	-8.91e-06	-7.44e-06	-6.46e-06	-7.42e-06	-6.79e-06	-9.23e-06	-8.89e-06	-9.18e-06	-1.015e-05	-1.048e-05	-1.22e-05	-1.358e-05	-1.132e-05	-1.134e-05	-1.253e-05	-1.01e-05	-9.31e-06	-8.12e-06	-9.24e-06	-7.85e-06	-1.05e-05	-6.54e-06	-7.58e-06	-1.219e-05	-1.053e-05	-9.63e-06	-8.86e-06	-8.61e-06	-7.58e-06	-1.044e-05	-1.327e-05	-8.46e-06	-9.56e-06	-5.95e-06
0	0	0	1	-2.143e-05	-1.583e-05	-1.359e-05	-1.182e-05	-1.324e-05	-1.305e-05	-8.16e-06	-1.461e-05	-1.523e-05	-1.304e-05	-1.542e-05	-1.931e-05	-1.882e-05	-1.401e-05	-1.544e-05	-1.98e-05	-2.402e-05	-1.957e-05	-1.738e-05	-2.034e-05	-1.643e-05	-1.243e-05	-1.459e-05	-1.803e-05	-1.605e-05	-1.135e-05	-1.2e-05	-1.333e-05	-1.371e-05	-1.71e-05	-1.804e-05	-1.414e-05	-1.438e-05	-1.501e-05	-1.603e-05	-1.283e-05	-1.546e-05	-1.805e-05	-1.667e-05	-1.36e-05	-1.251e-05	-1.867e-05	-1.969e-05	-1.484e-05	-1.674e-05	-1.621e-05
[truncated: 5,000 more columns]
